# Supplementary material for: Incorporation of U(iv) in monazite–cheralite ceramics under oxidizing and inert atmospheres
Source: Royal Society of Chemistry journal article supplement (doi:10.1039/d3dt03251e), 2024-01-01
Supplement: d3dt03251e1.pdf [file d3dt03251e1.pdf]

*Supporting Information*

## Incorporation of U(IV) in monazite-cheralite ceramics under oxidizing and inert atmospheres

Alison El Monjid<sup>1</sup>, Stéphanie Szenknect<sup>1,\*</sup>, Adel Mesbah<sup>2</sup>, Myrtille O.J.Y. Hunault<sup>3</sup>, Denis Menut<sup>3</sup>,  
Nicolas Clavier<sup>1</sup>, Nicolas Dacheux<sup>1</sup>

1: ICSM, Univ Montpellier, CNRS, CEA, ENSCM, Site de Marcoule, Bagnols/Cèze, France

2: Univ Lyon, Université Claude Bernard Lyon 1, CNRS, IRCELYON, F-69626 Villeurbanne, France

3: Synchrotron SOLEIL, L'Orme des Merisiers, Départementale 128, 91190 Saint-Aubin, France

\*corresponding author: stephanie.szenknect@cea.fr

The average ionic radius of cations incorporated in the monazite-cheralite were calculated as follows:

$$\bar{r} = (1 - 2x) \times r_{Nd^{(IX)}} + x \times (r_{Ca^{(IX)}} + r_{U^{(IX)}}) \quad (1)$$

The different effective ionic radii used to calculate this average ionic radius, in the case of our study are reported in Table S1.

*Table S1: Selected effective ionic radius, reported for Nd<sup>3+</sup>, Ca<sup>2+</sup> and U<sup>4+</sup> in 9-fold coordination [1].*

|            | $r_{Nd^{3+}} (\text{Å})$ | $r_{Ca^{2+}} (\text{Å})$ | $r_{U^{4+}} (\text{Å})$ |
|------------|--------------------------|--------------------------|-------------------------|
| <b>CN9</b> | 1.163                    | 1.18                     | 1.05                    |

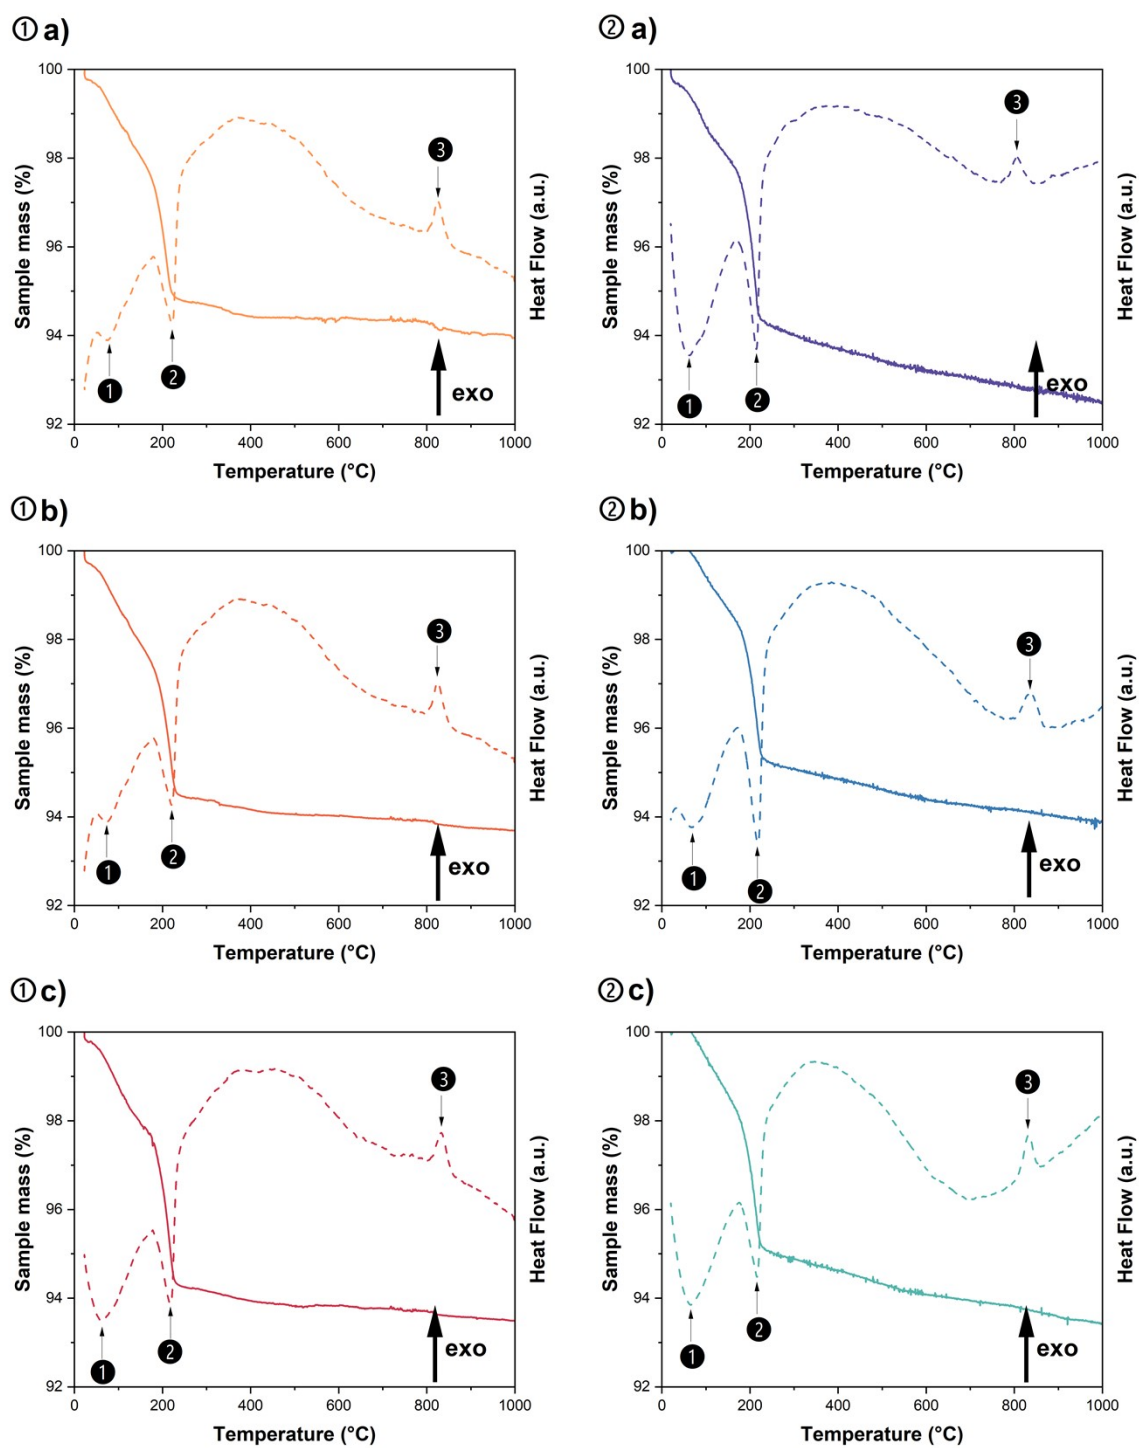

Figure S1: TG and DT scans obtained for  $Nd_{0.95}Ca_{0.025}U_{0.025}PO_4 \cdot nH_2O$  (a),  $Nd_{0.9}Ca_{0.05}U_{0.05}PO_4 \cdot nH_2O$  (b),  $Nd_{0.85}Ca_{0.075}U_{0.075}PO_4 \cdot nH_2O$  (c), converted under air ① and under argon ②.

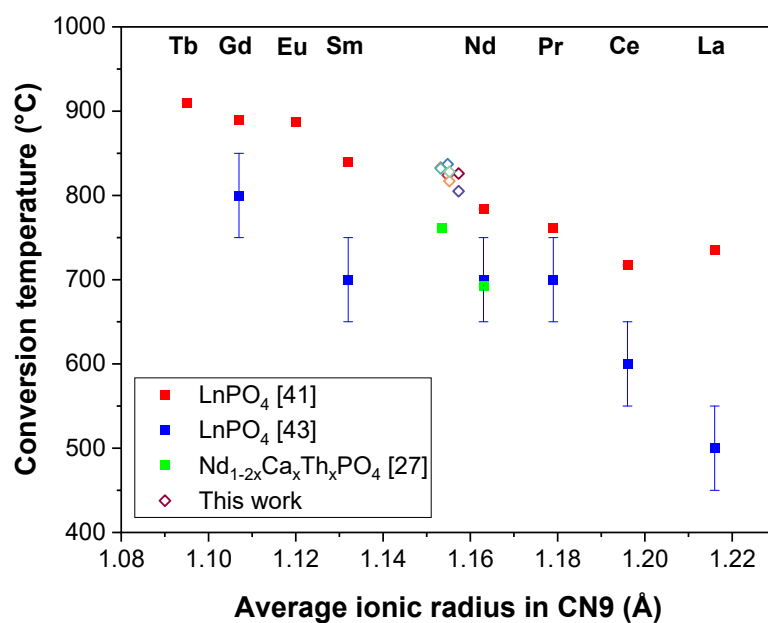

Figure S2: Variation of the temperature of phase transition from rhabdophane to monazite-cheralite solid solution as a function of the average ionic radius in CN 9. The data for the monazite end-members were extracted from Kijkowska et al. [2], Jonasson and Vance [3], the data for Th-monazite-cheralite were taken from Qin et al. [4].

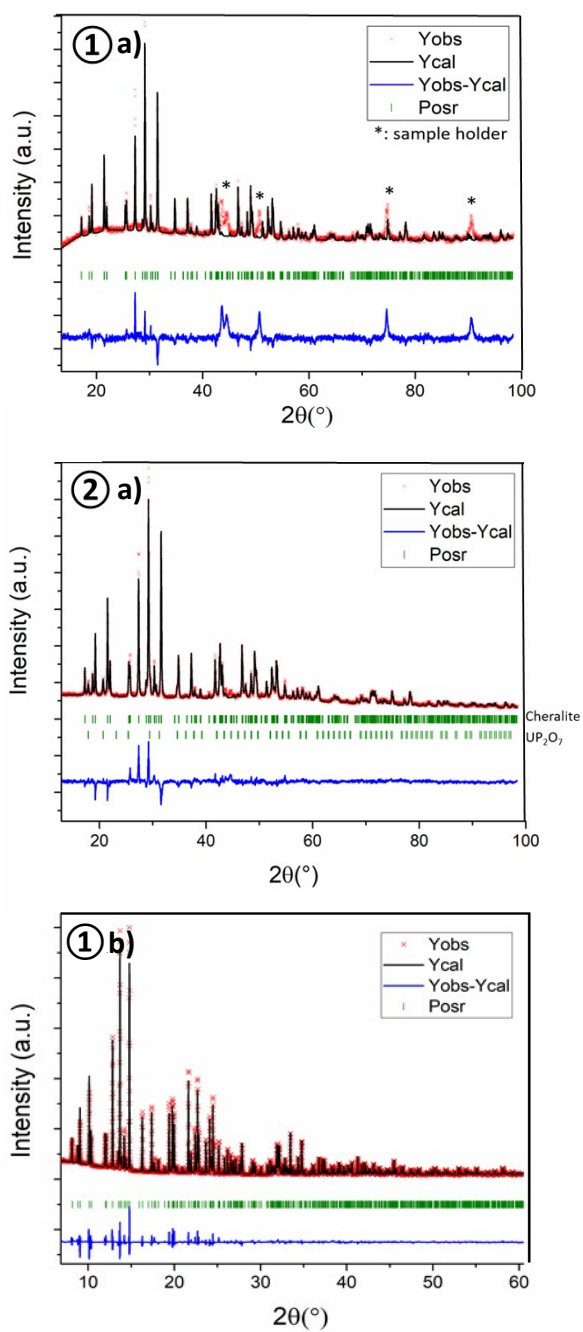

Figure S3: Rietveld refinement of PXR (a) and SPXR (b) of  $\text{Nd}_{0.8}\text{Ca}_{0.1}\text{U}_{0.1}\text{PO}_4$  samples converted under air ① and under argon atmosphere ②.

## Supporting Information

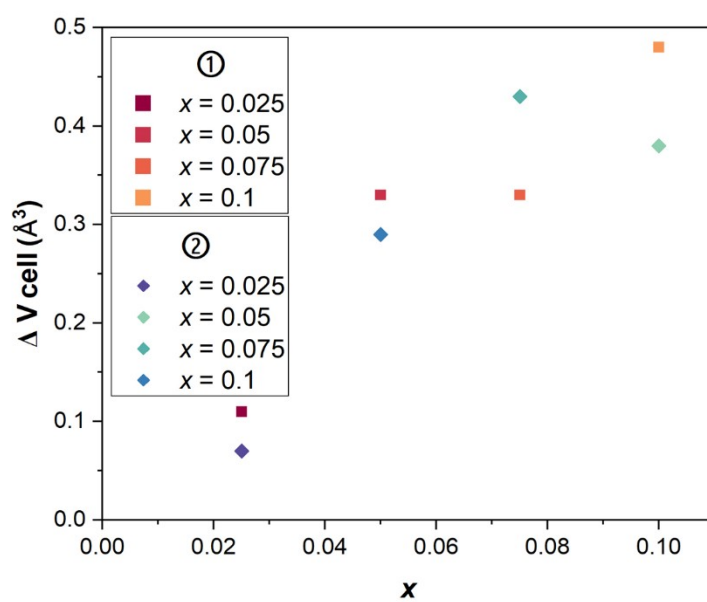

Figure S4:  $\Delta V_{\text{cell}}$  represent the difference between the experimental cell volume obtained by Rietveld refinement of PXRD diagrams of U-monazite-cheralite solid solutions  $\text{Nd}_{1-2x}\text{Ca}_x\text{U}_x\text{PO}_4$  prepared in air (1) and in Ar (2) with that calculated from the proportional combination of the endmembers.

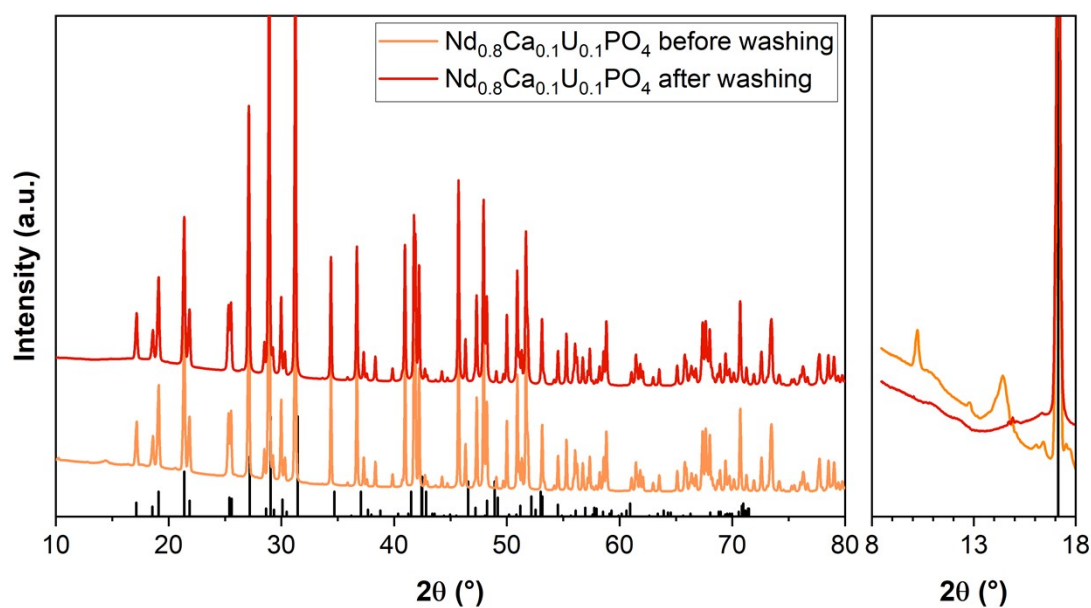

Figure S5: SPXRD patterns obtained by synchrotron analysis of  $\text{Nd}_{0.8}\text{Ca}_{0.1}\text{U}_{0.1}\text{PO}_4$  converted under air at  $1100\text{ }^\circ\text{C}$  for 6 h. The red and orange lines represent monazite-cheralite before and after the washing step, respectively. Peaks positions of cheralite reference are taken from [6].

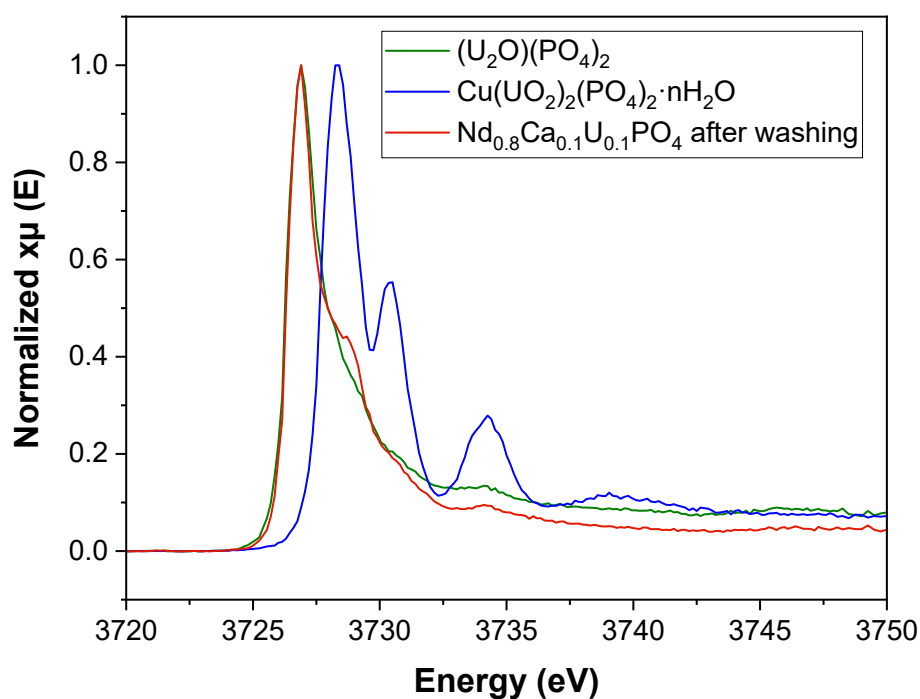

Figure S6: U  $M_4$ -edge HERFD-XANES spectrum of  $\text{Nd}_{0.8}\text{Ca}_{0.1}\text{U}_{0.1}\text{PO}_4$  converted under air after washing step. Reference spectra for U(IV) and U(VI) were obtained by using  $(\text{U}_2\text{O})(\text{PO}_4)_2$  and  $\text{Cu}(\text{UO}_2)_2(\text{PO}_4)_2 \cdot \text{H}_2\text{O}$ , respectively.

## References

- [1] R.D. Shannon, Revised effective ionic-radii and systematic studies of interatomic distances in halides and chalcogenides, *Acta Crystallographica Section A*, 32 (1976) 751-767.
- [2] R. Kijkowska, Thermal decomposition of lanthanide orthophosphates synthesized through crystallisation from phosphoric acid solution, *Thermochimica Acta*, 404 (2003) 81-88.
- [3] R. Jonasson, E. Vance, DTA study of the rhabdophane to monazite transformation in rare earth (La-Dy) phosphates, *Thermochimica acta*, 108 (1986) 65-72.
- [4] D.W. Qin, A. Mesbah, N. Clavier, S. Szenknect, N. Dacheux, From Th-Rhabdophane to Monazite-Cheralite Solid Solutions: Thermal Behavior of  $\text{Nd}_{1-2x}\text{Th}_x\text{Ca}_x\text{PO}_4 \cdot n\text{H}_2\text{O}$  ( $x=0-0.15$ ), *Crystal Growth & Design*, 19 (2019) 2794-2801.
- [5] A. Shelyug, A. Mesbah, S. Szenknect, N. Clavier, N. Dacheux, A. Navrotsky, Thermodynamics and Stability of Rhabdophanes, Hydrated Rare Earth Phosphates  $\text{REPO}_4 \cdot n\text{H}_2\text{O}$ , *Frontiers in Chemistry*, 6 (2018) 604.
- [6] M. Keskar, G.P. Shelke, M. Shafeeq, R.A. Phatak, S.K. Sali, S. Kannan, Structural and thermal investigations of  $\text{CaU}(\text{PO}_4)_2$ ; phase diagram study of MO-UO<sub>2</sub>-P<sub>2</sub>O<sub>5</sub> systems (M = Ca, Sr, Ba), *J Solid State Chem*, 278 (2019).
